# Supplementary material for: Implementation of the Sono-Heat-Exchanger in the Extra Virgin Olive Oil Extraction Process: End-User Validation and Analytical Evaluation
Source: MDPI journal article supplement (doi:10.3390/molecules24132379), 2019-06-27

Supplementary material

**Figure S1.** Spider web plot obtained by sensorial analysis of two samples, obtained by the same batch of olives processed with (green in the plot) or without (yellow) the use of ultrasounds

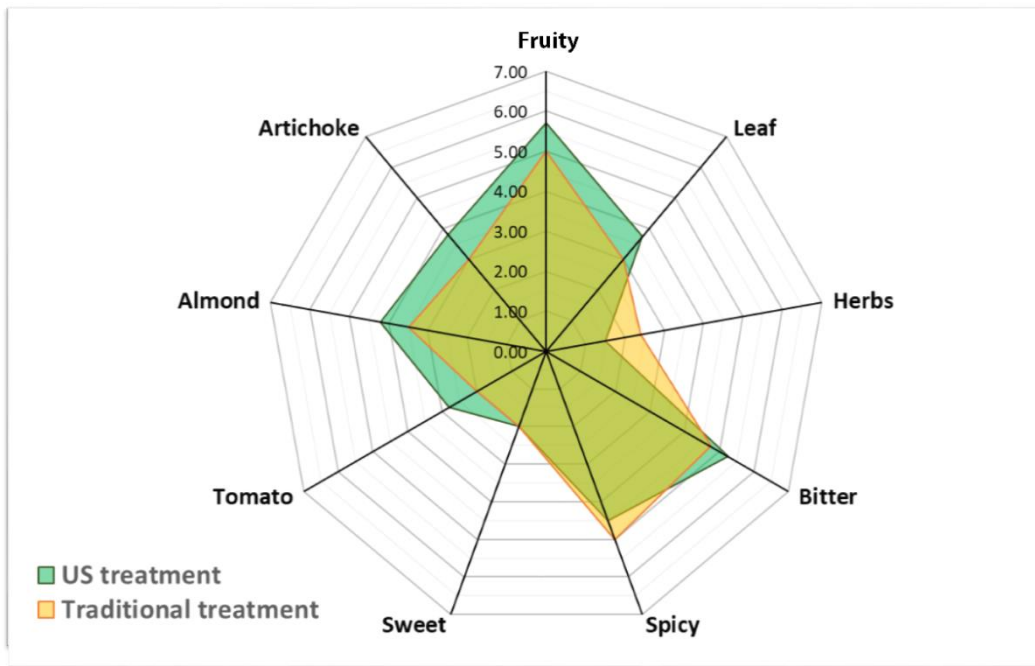

Supplement: s1 [file s1]
